# Supplementary material for: Structural Characterization of Peripolin and Study of Antioxidant Activity of HMG Flavonoids from Bergamot Fruit
Source: MDPI journal article supplement (doi:10.3390/antiox11101847), 2022-09-20
Supplement: s1 [file s1]

# Structural characterization of Peripolin and Study of Antioxidants

## Activity of HMG-Flavonoids from Bergamot Fruit

### Supplementary material

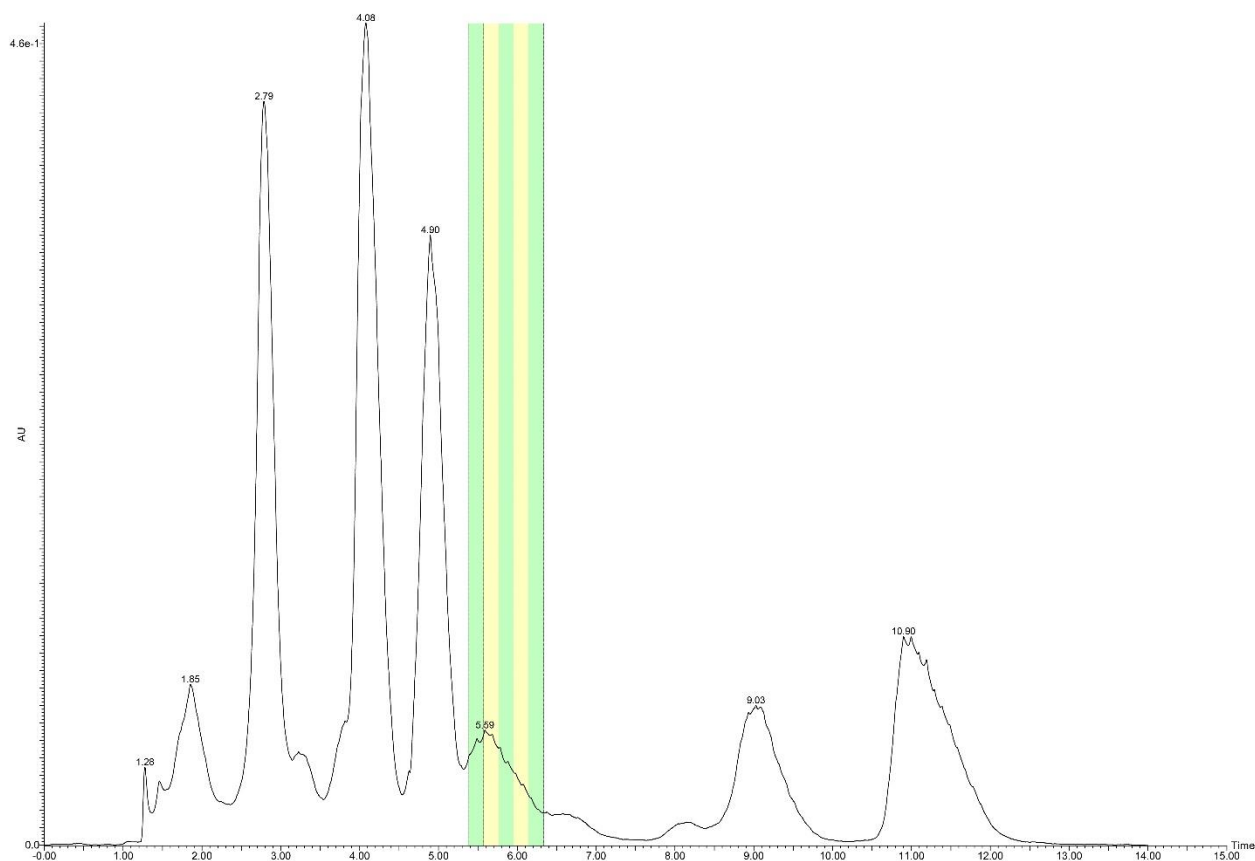

**Figure S1.** Semipreparative HPLC-UV chromatogram from gross fractionation of the bergamot flavonoid pool. Each fraction collected is represented by yellow and green column corresponding to a collected volume of 4.2 mL.

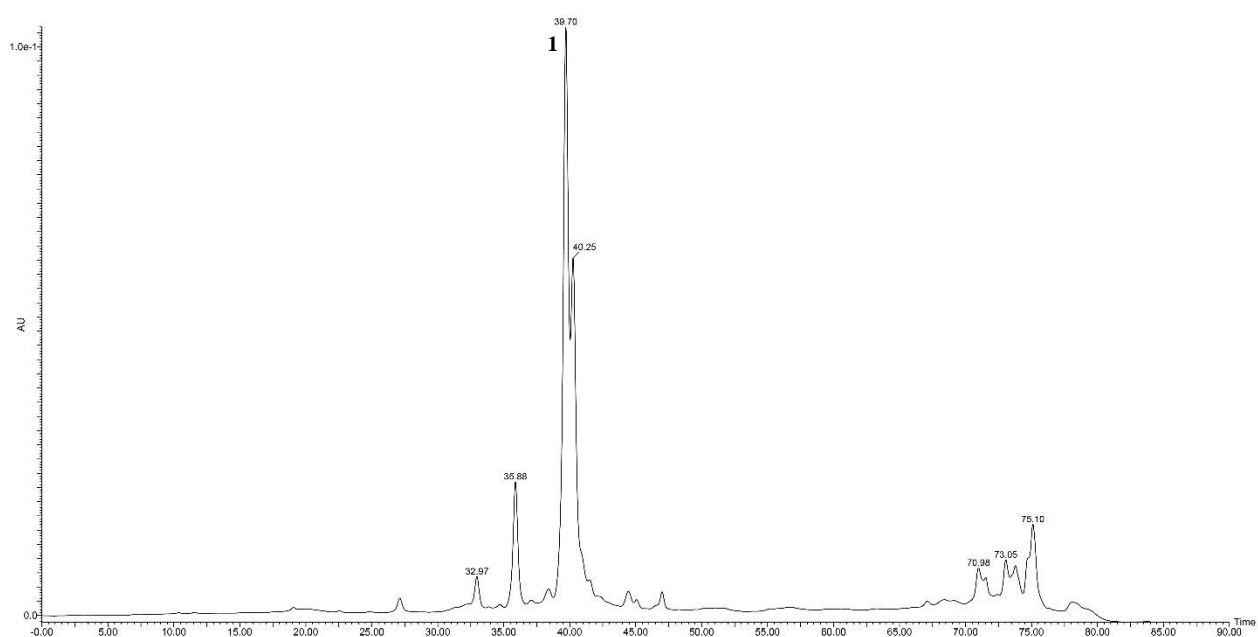

**Figure S2.** HPLC-UV chromatogram of the partially purified fraction containing peripolin (**1**)

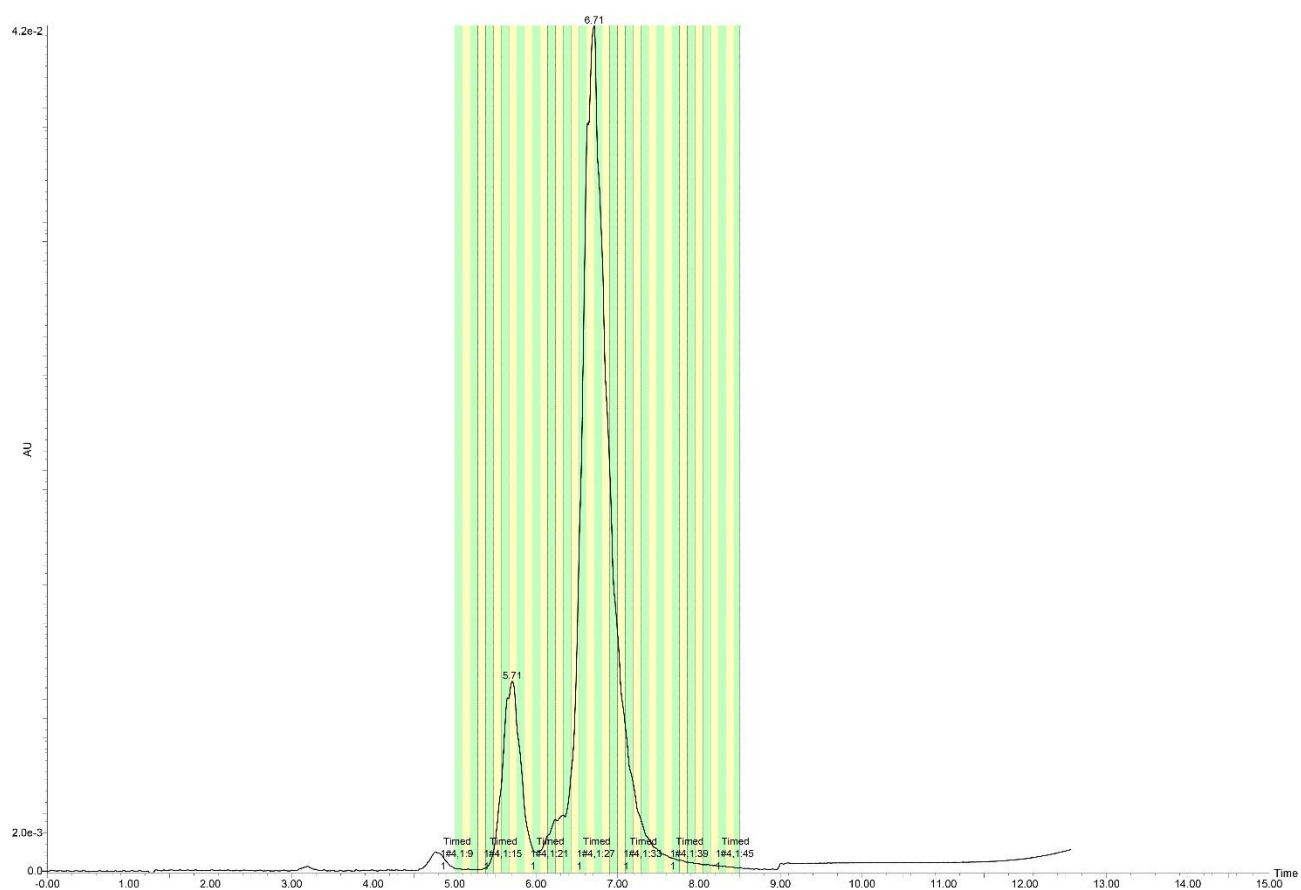

**Figure S3.** Semipreparative HPLC-UV chromatogram of the partially purified solution containing peripolin from the fine fractionation step. Each fraction collected is represented by yellow and green column corresponding to a volume of 2 mL.

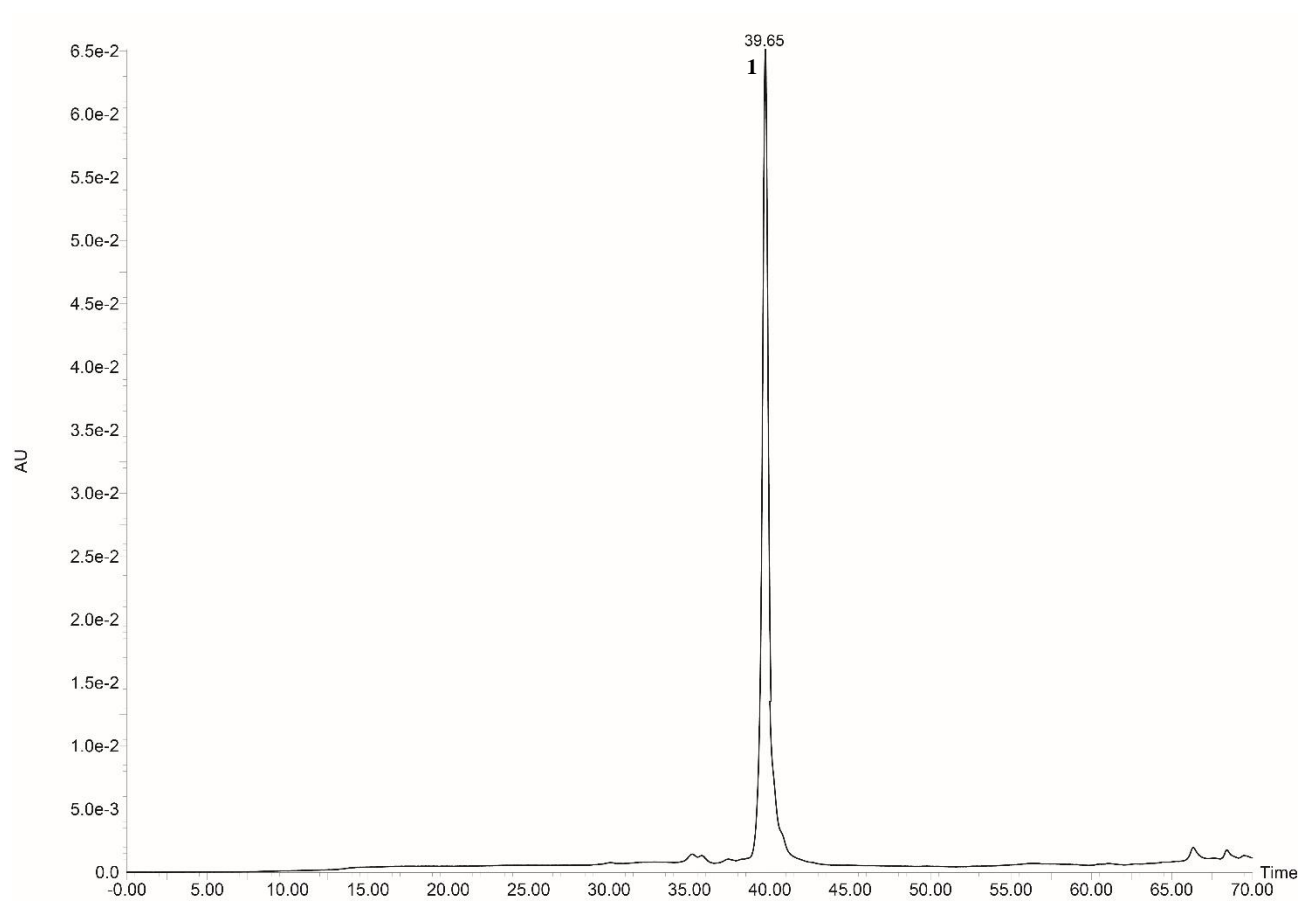

**Figure S4.** HPLC-UV chromatogram of the pure peripolin (**1**)

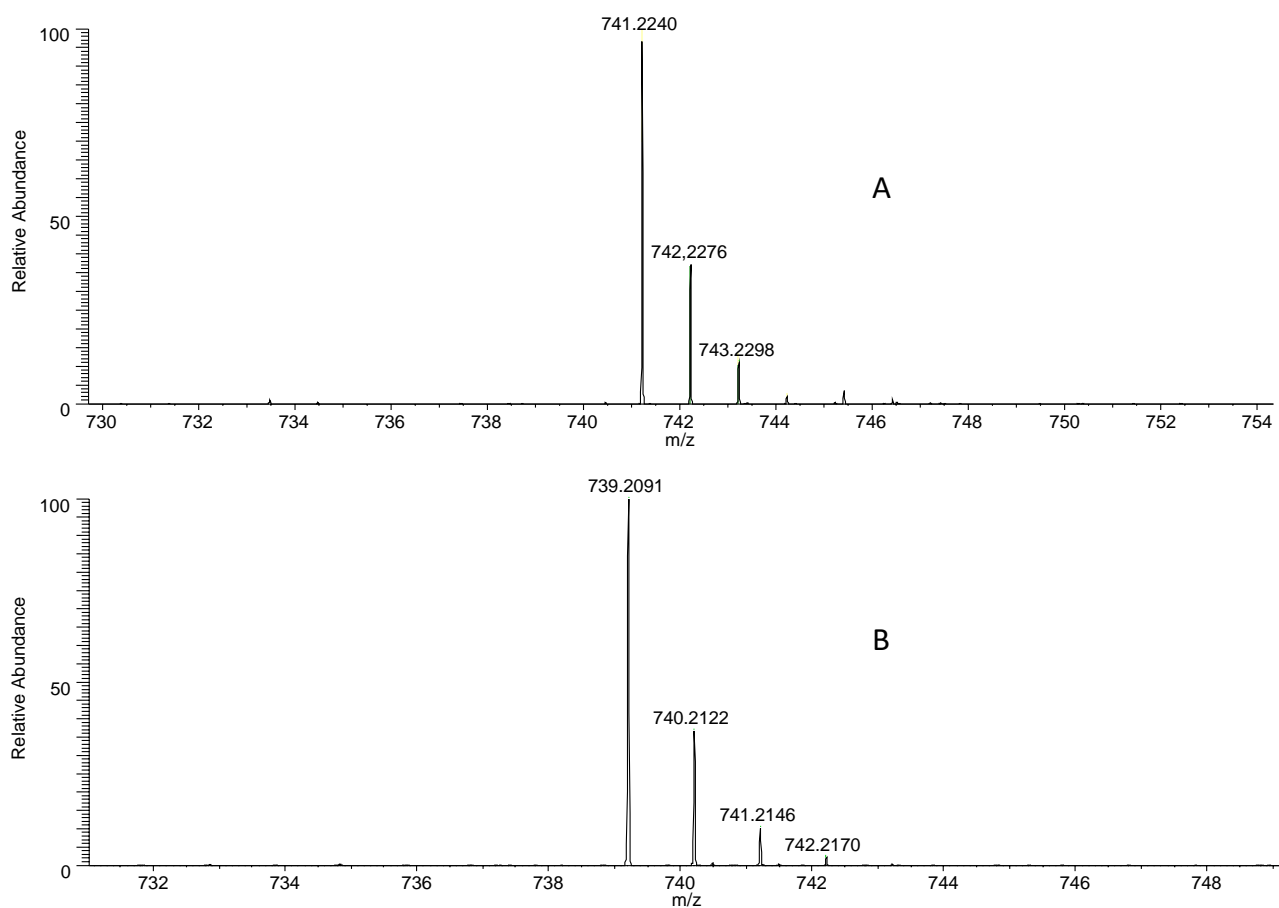

**Figure S5.** HR-ESI MS spectra of pure Peripolin (**1**) in positive (**A**) and negative (**B**) ion mode.

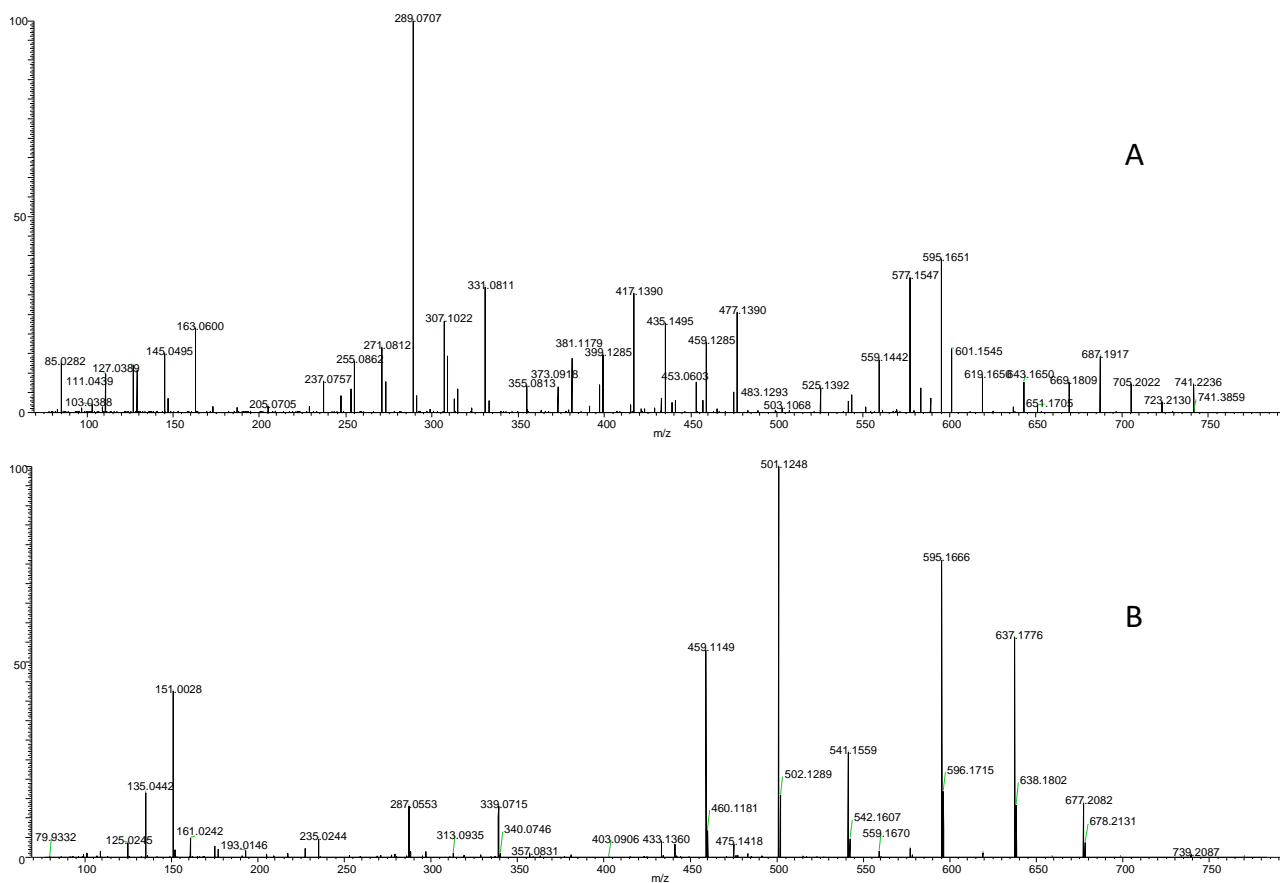

**Figure S6.** HR-ESI MSMS spectra of pure Peripolin (**1**) in positive (**A**) and negative (**B**) ion mode.

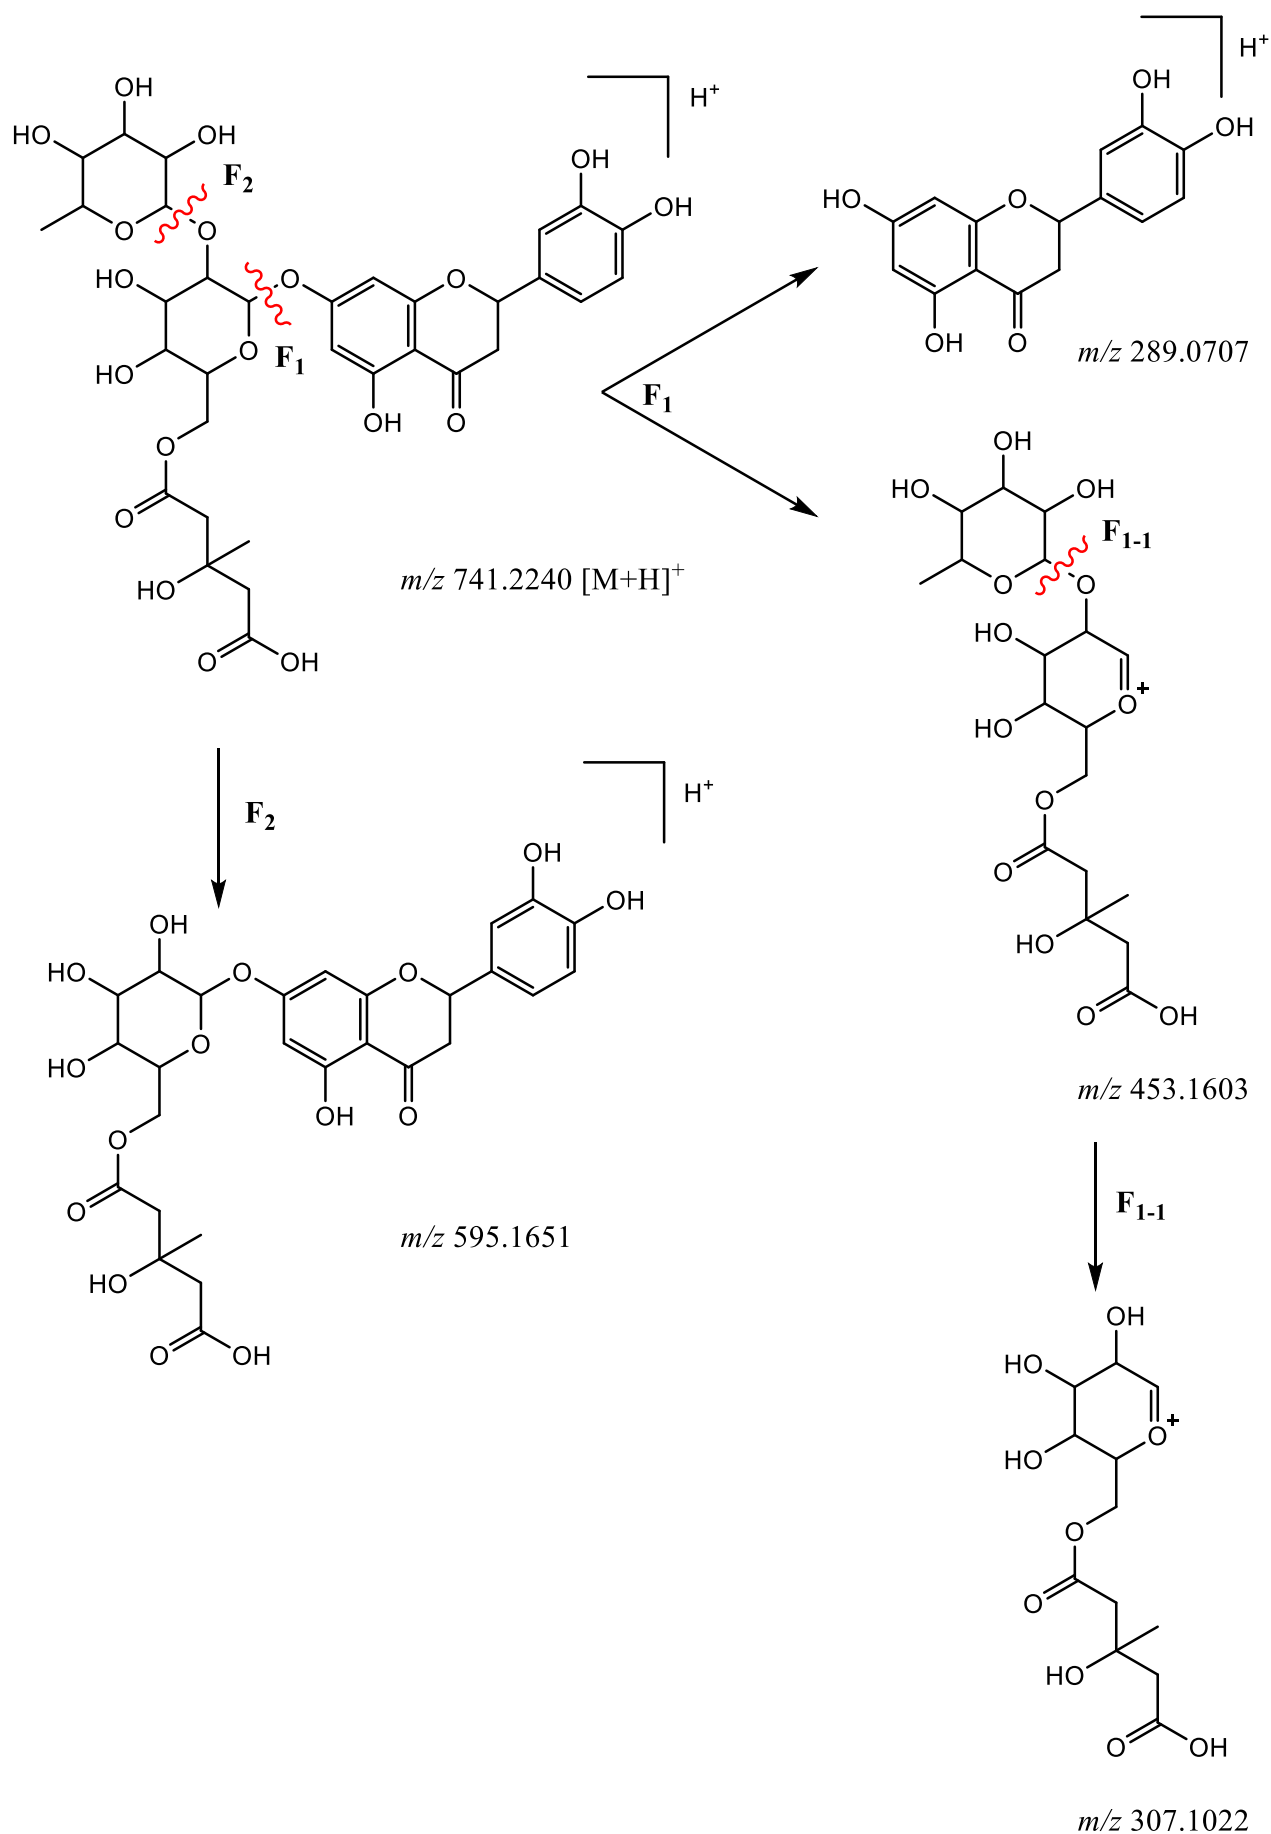

**Scheme S1.** Gas phase fragmentation of protonated peripolin in positive mode.

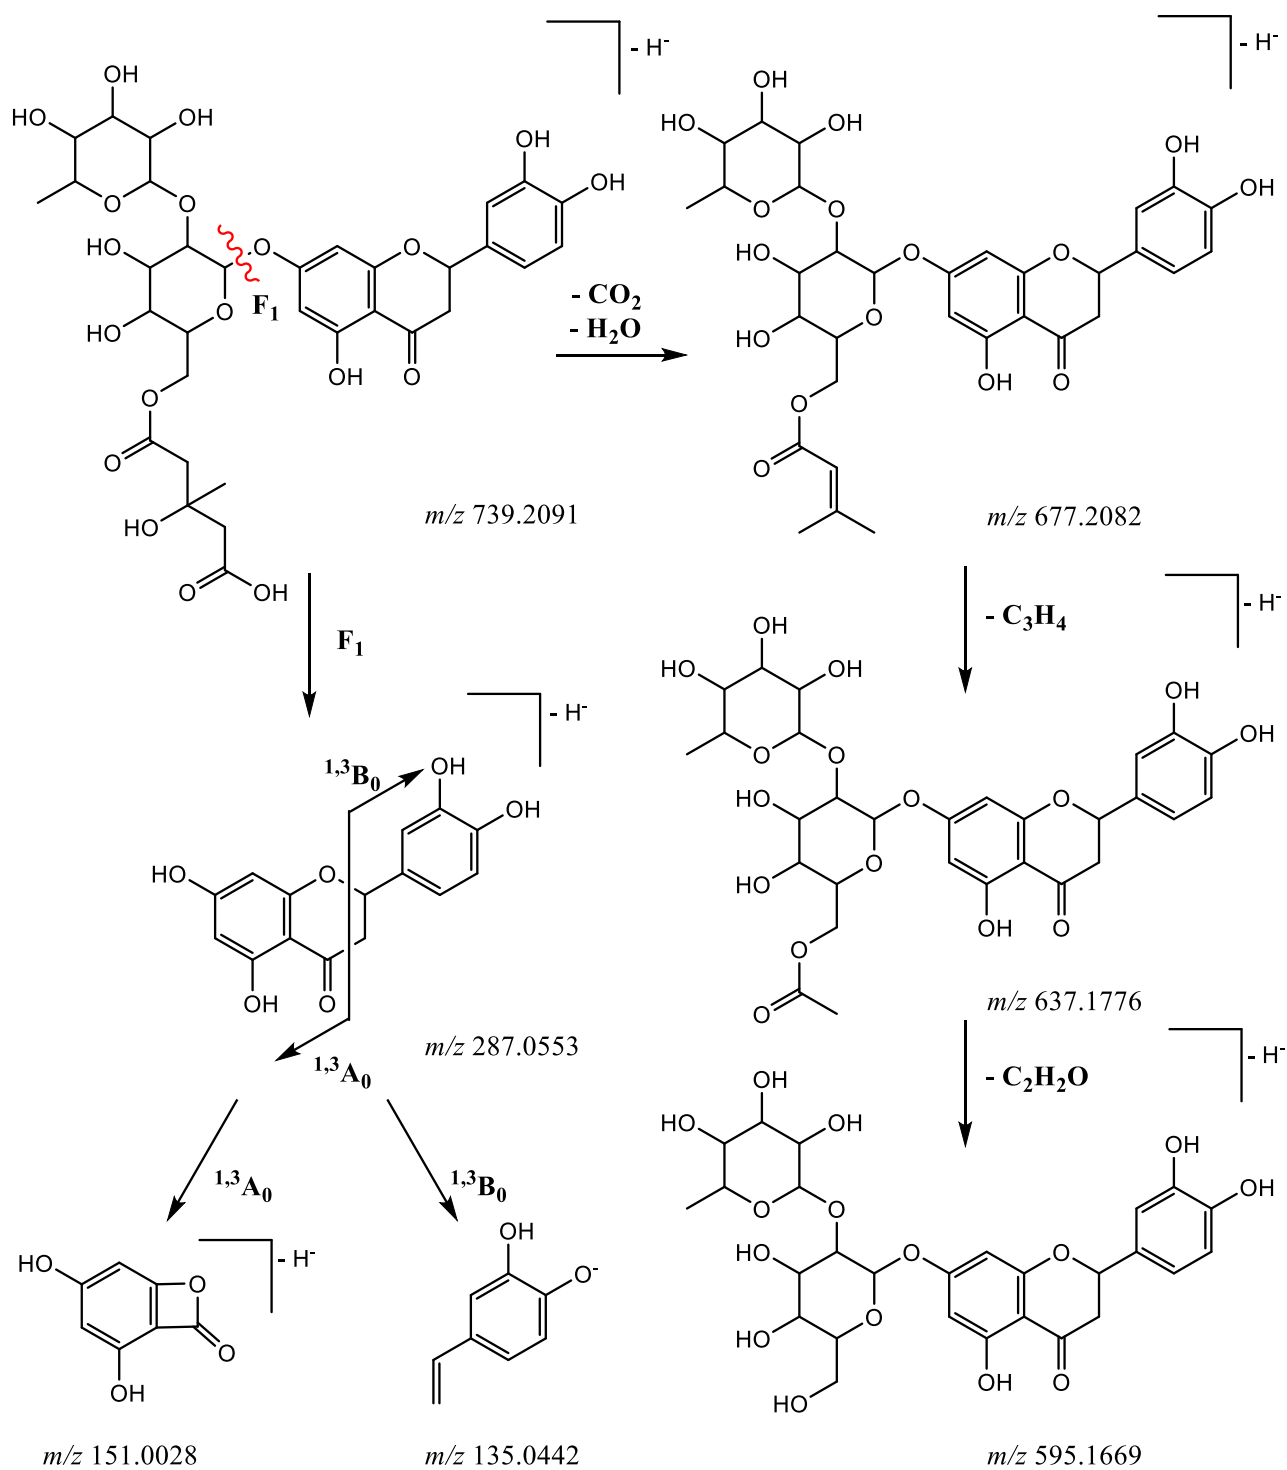

**Scheme S2.** Gas phase fragmentation of deprotonated peripolin in negative mode.



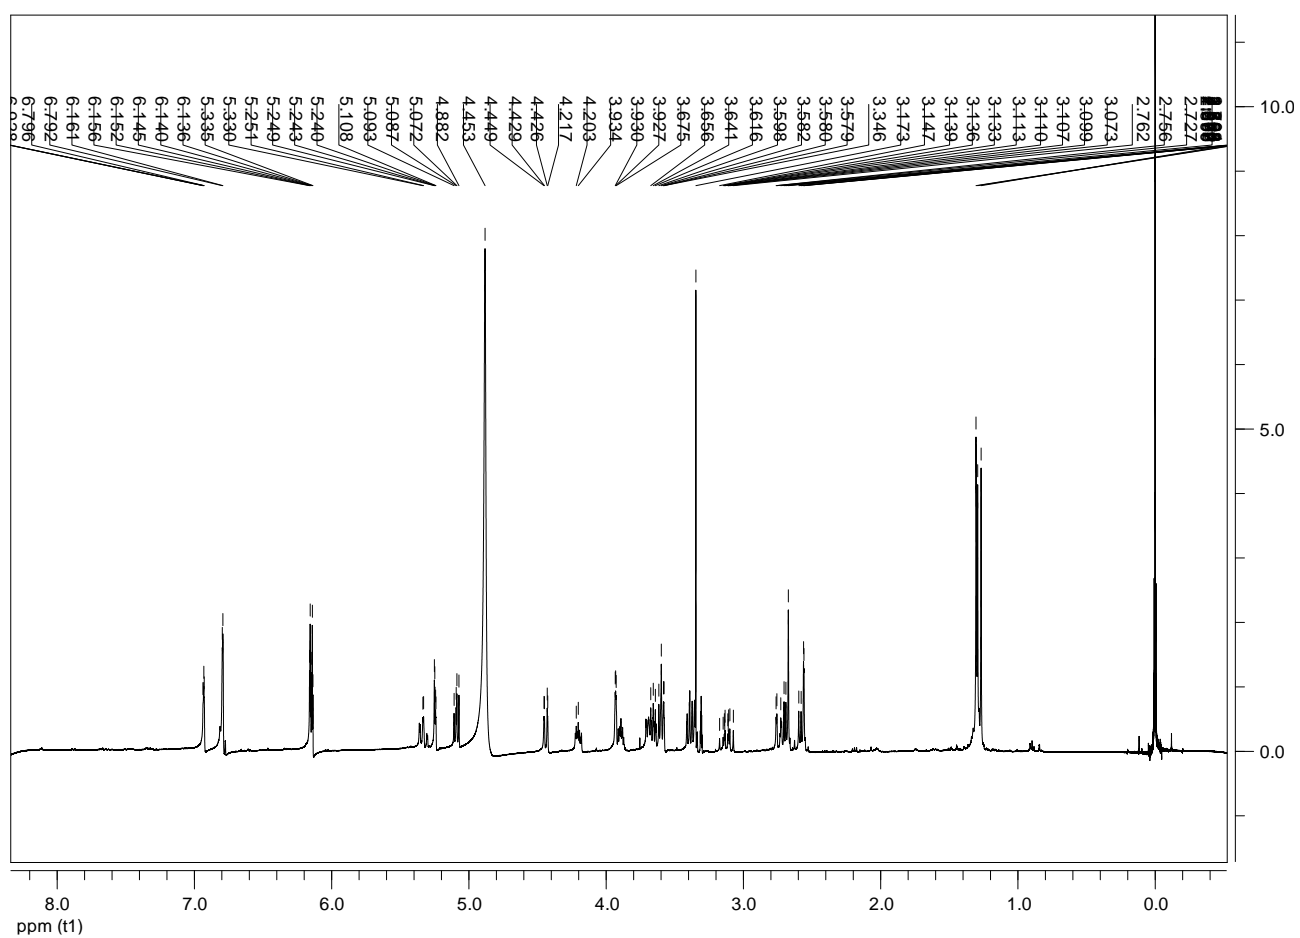

**Figure S7.**  $^1\text{H}$ -NMR spectrum of pure Peripolin (1).

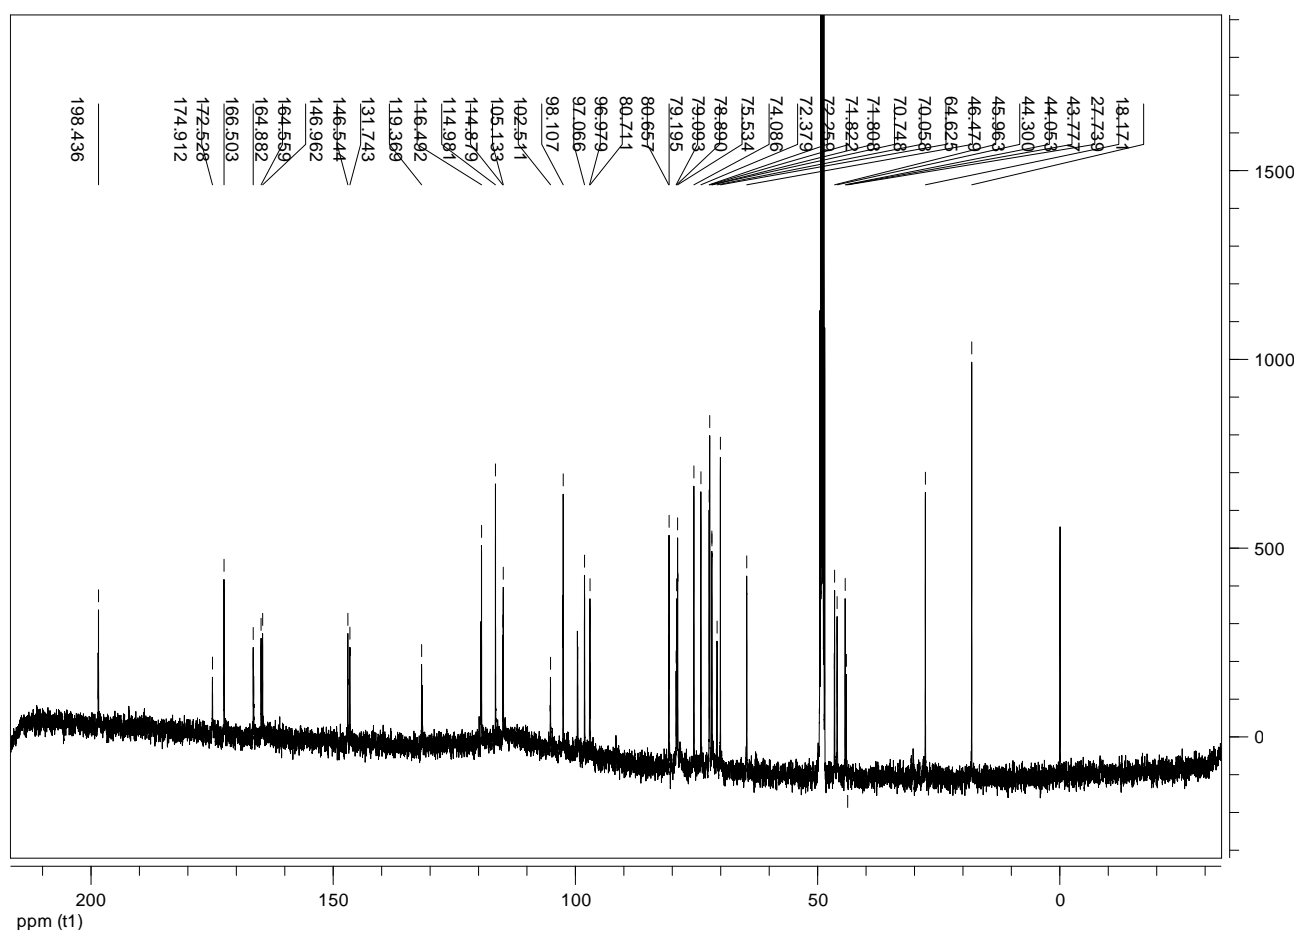

**Figure S8.**  $^{13}\text{C}$ -NMR spectrum of pure Peripolin (1).

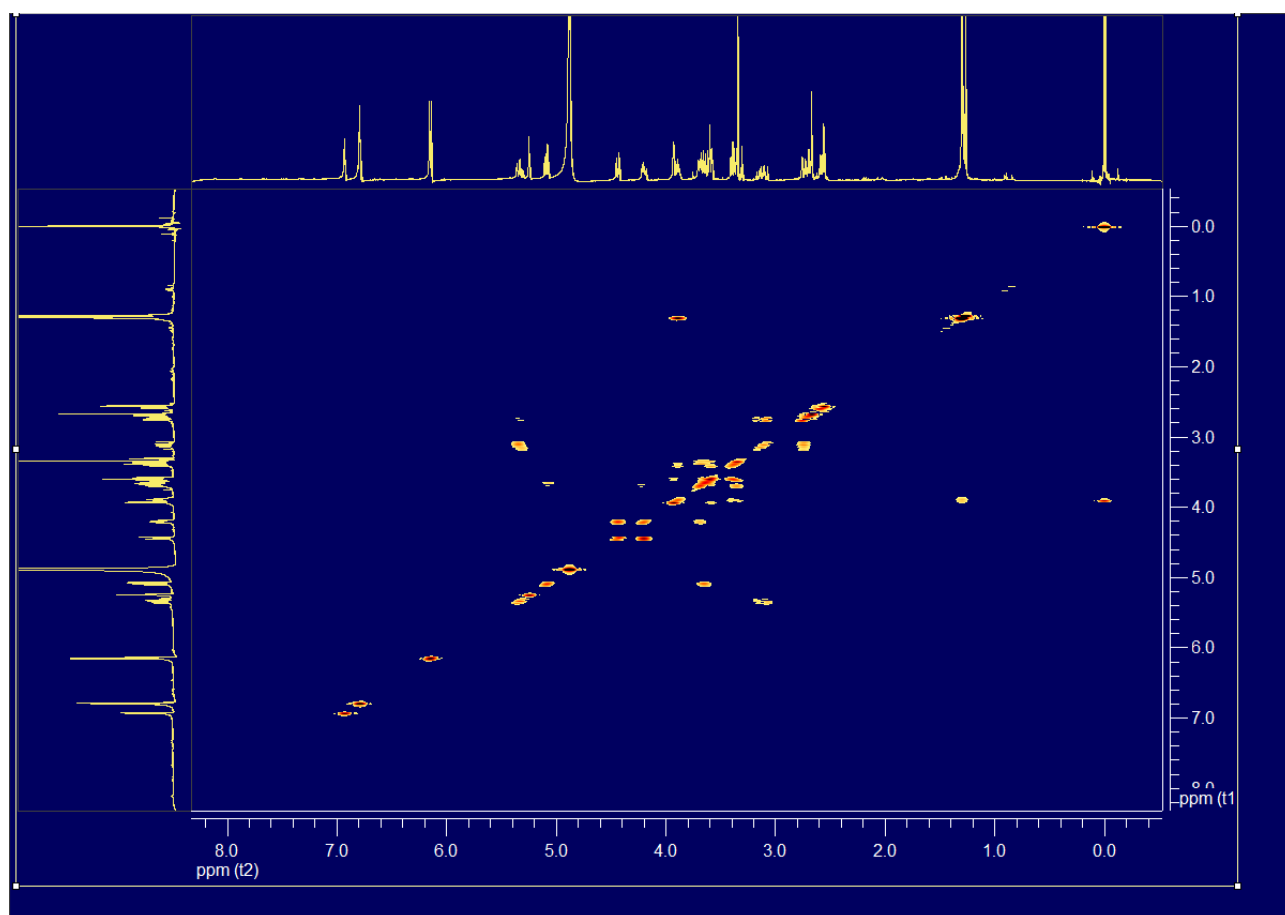

**Figure S9.**  $^1\text{H}$ - $^1\text{H}$  COSY-NMR spectrum of pure Peripolin (**1**).

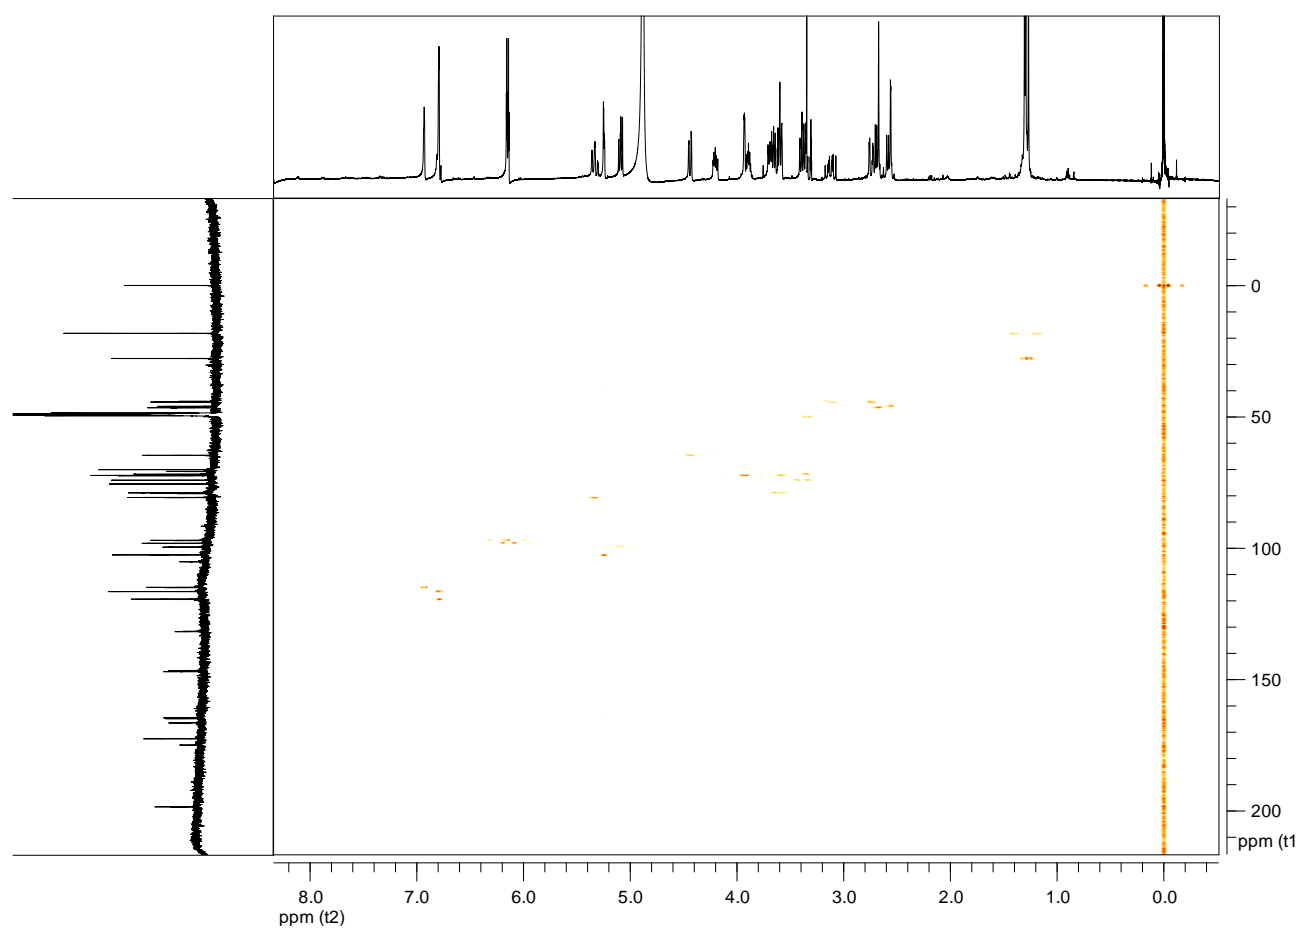

**Figure S10.**  $^1\text{H}$ - $^{13}\text{C}$  HMQC-NMR spectrum of pure Peripolin (**1**).

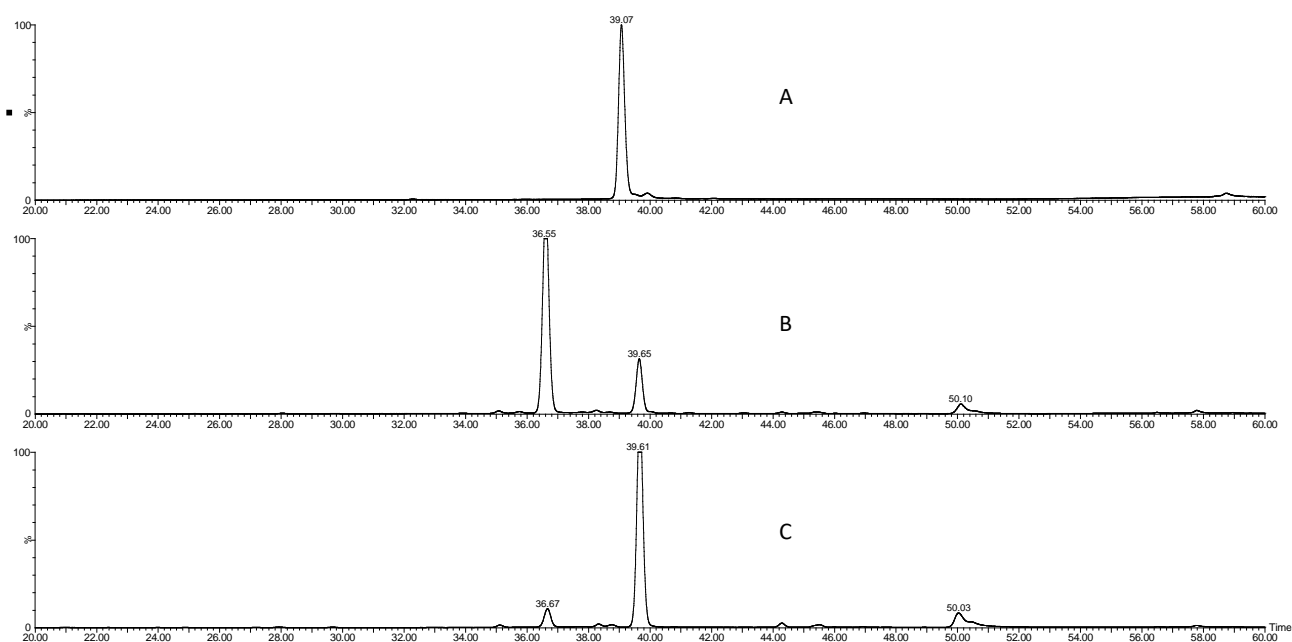

**Figure S11.** Enzyme (neohesperidase) cleavage of the sugar moiety of Peripolin (**1**): (A) Signal at retention time 39.07 represents Peripolin at  $t = 0\text{h}$ ; (B) signals at retention time 36.55 and 39.65 represent, respectively, enzyme reaction products eriodictyol 7-O-(6''-(3'''-hydroxy-3'''-methylglutaryl)- $\beta$ -glucoside and eriodictyol at  $t = 4\text{h}$ ; (C) signals at retention time 39.61 represents eriodictyol at  $t = 20\text{h}$

**Table S1.** IC<sub>50</sub> values for flavonoids and inhibition of DPPH radical for neoeriocitrin, peripolin and Trolox at 10 µM.

|               | DPPH IC <sub>50</sub><br>(µmol/L)     | ABTS IC <sub>50</sub><br>(µmol/L) | FRAP IC <sub>50</sub><br>(µmol/L) |
|---------------|---------------------------------------|-----------------------------------|-----------------------------------|
| Neoeriocitrin | 9                                     | 11                                | 9                                 |
| Naringin      | >200                                  | >20                               | >400                              |
| Neohesperidin | 120                                   | 11                                | 10                                |
| Peripolin     | 17                                    | 19                                | 14                                |
| Melitidin     | >200                                  | >20                               | >100                              |
| Brutieridin   | >200                                  | 18                                | 20                                |
|               | Flavononoid Concentration<br>(µmol/L) | DPPH Inhibition<br>(%)            |                                   |
| Neoeriocitrin | 10                                    | 58                                |                                   |
| Peripolin     | 10                                    | 27                                |                                   |
| Trolox        | 10                                    | 17                                |                                   |

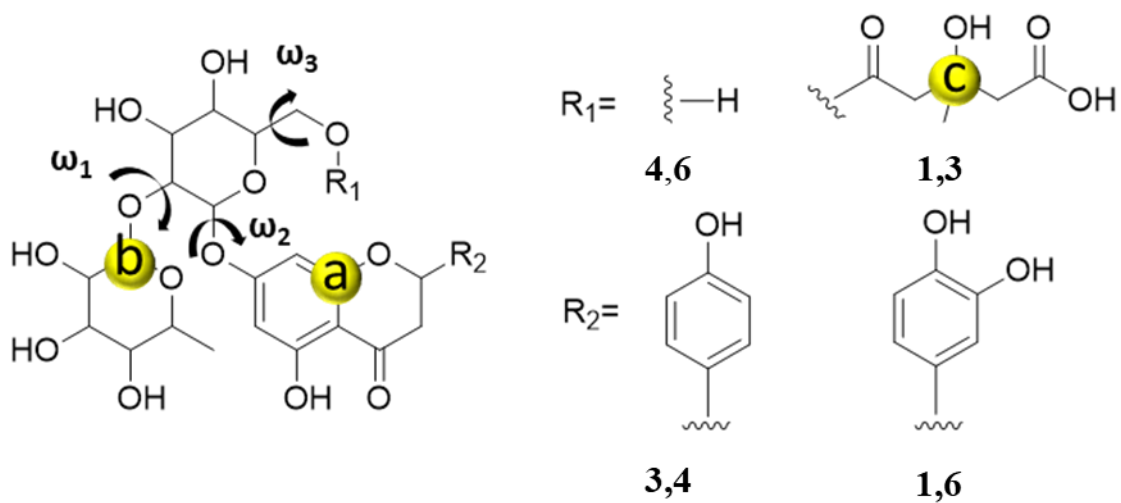

**Scheme S3.** Dihedral angles and center of masses investigated during the MD simulations of compounds **1**, **3**, **4** and **6**.

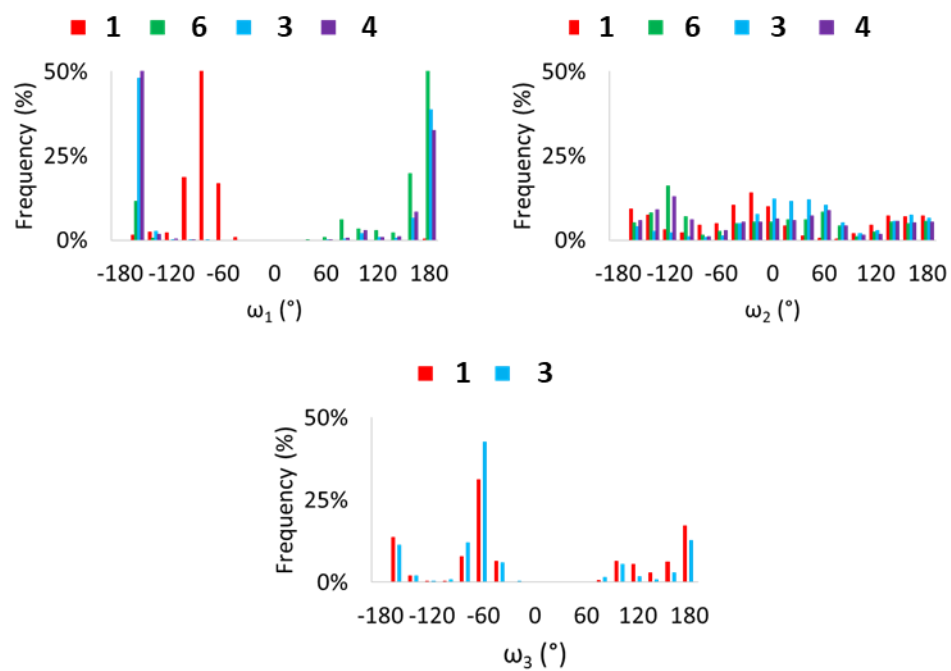

**Figure S12.** Frequency distribution of dihedral angle from MD trajectories.



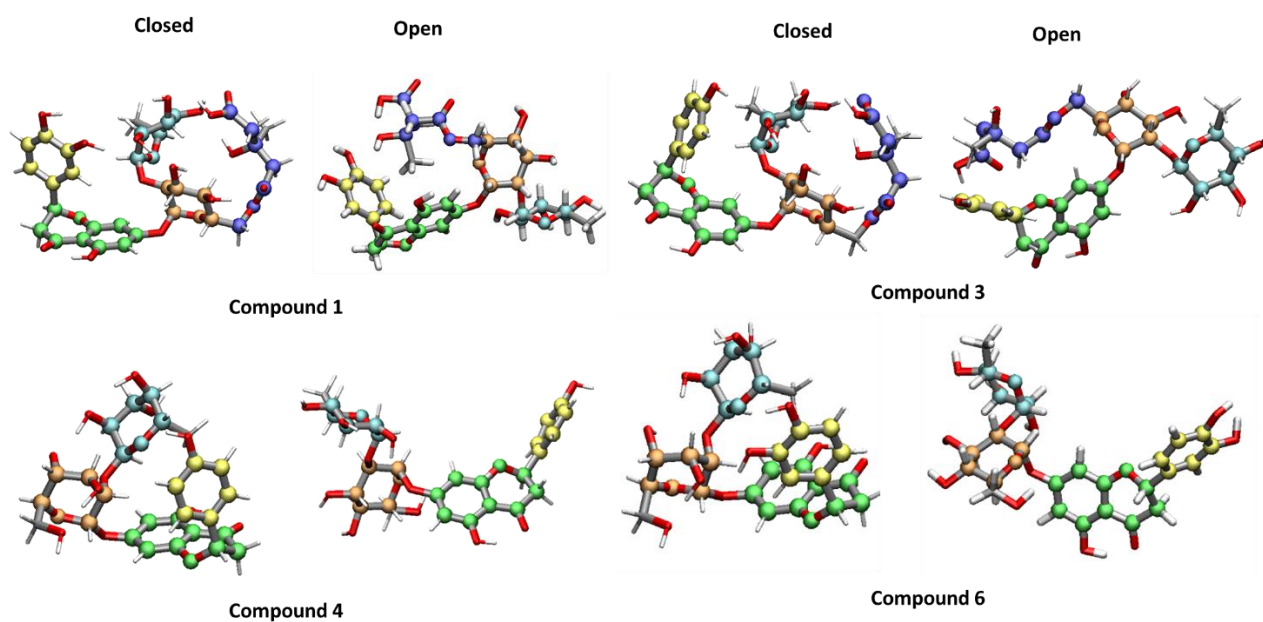

**Figure S13.** Optimized structures of compounds **1**, **3**, **4** and **6**, in both closed and open conformations, at PCM(ethanol)/B3LYP-D3/6-31+G(d,p) level of theory.

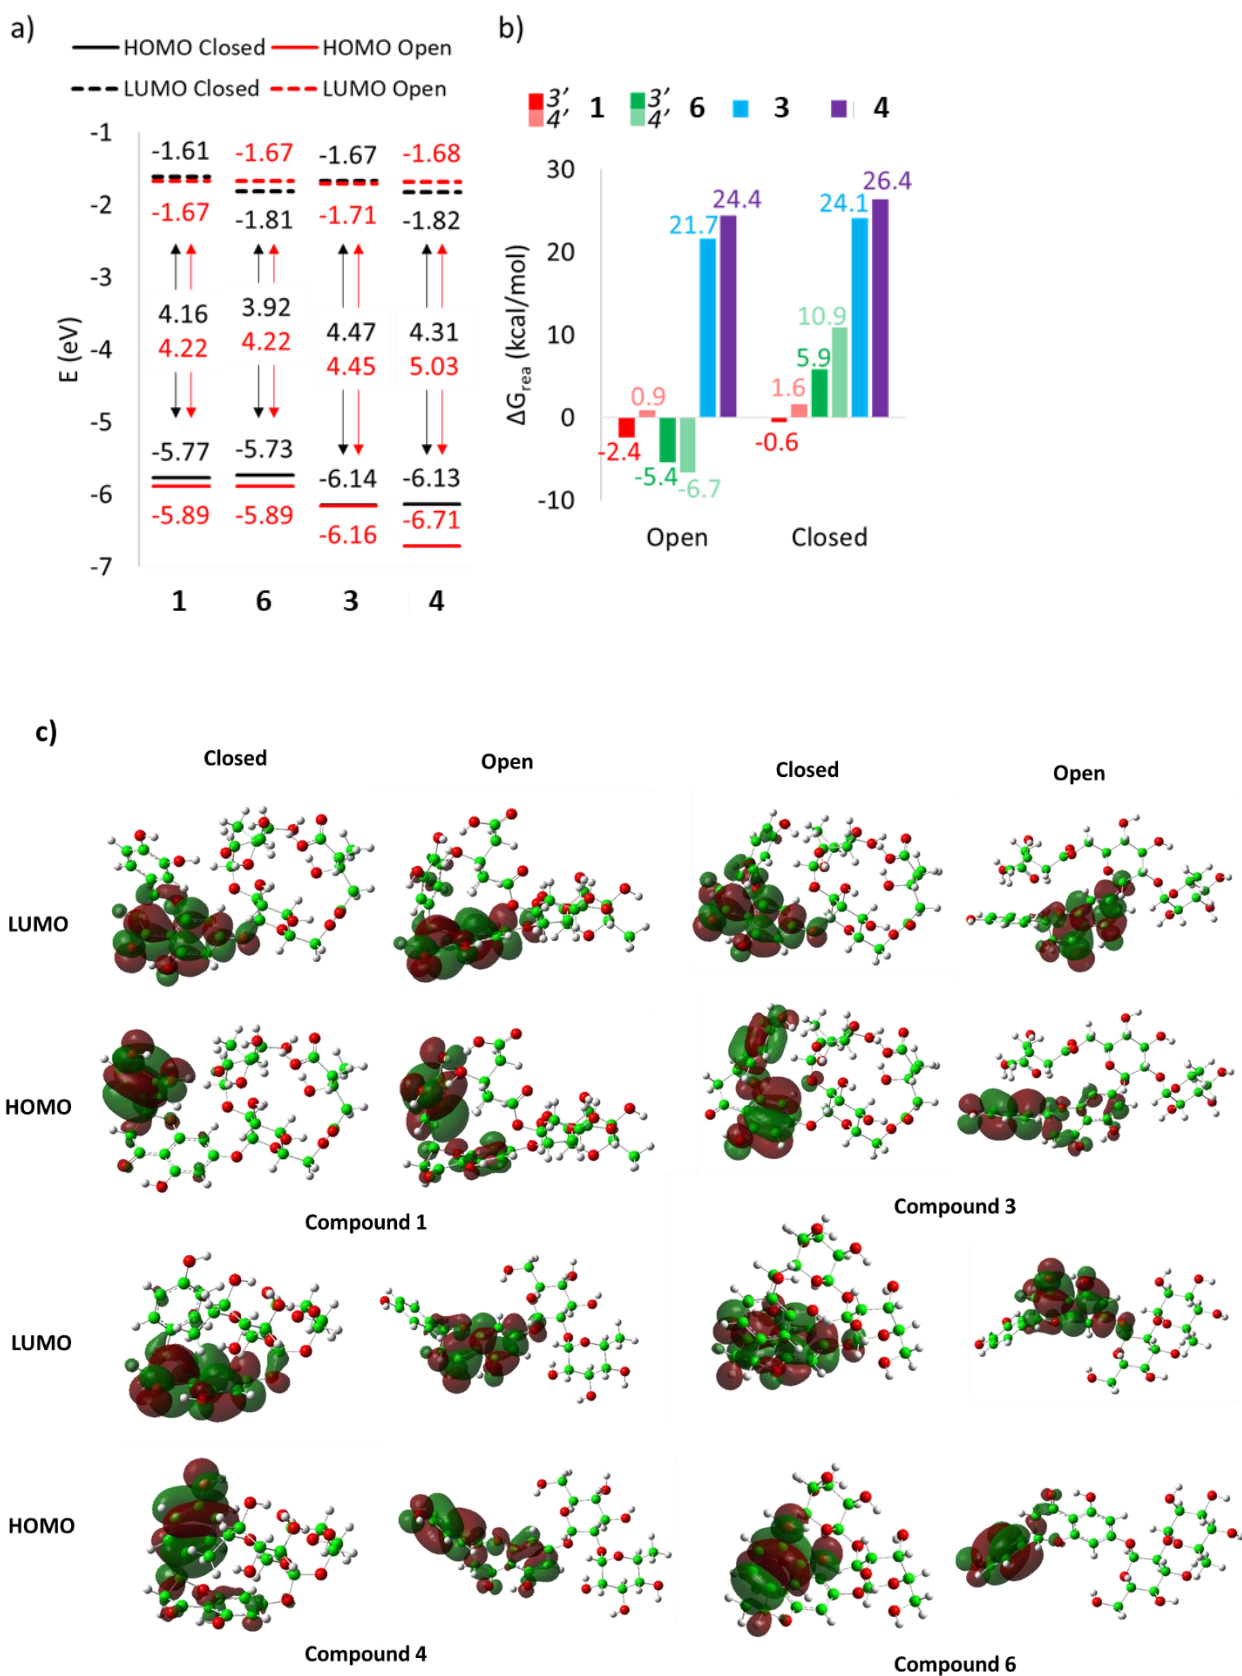

**Figure S14.** a) Calculated HOMO-LUMO gaps, b)  $\Delta G_{\text{rea}}$  for **1**, **3**, **4** and **6** species c) HOMO-LUMO localization, in both open and closed conformations of compounds **1**, **3**, **4** and **6**.
